# Supplementary material for: Two subsets of stem-like CD8+ memory T cell progenitors with distinct fate commitments in humans
Source: Springer Nature journal article supplement (doi:10.1038/s41590-020-0791-5), 2020-10-12
Supplement: 41590_2020_791_MOESM1_ESM.pdf [file 41590_2020_791_MOESM1_ESM.pdf]

---

**Supplementary information**

---

**Two subsets of stem-like CD8<sup>+</sup> memory  
T cell progenitors with distinct fate  
commitments in humans**

---

In the format provided by the  
authors and unedited

# Supplementary Fig. 1

**a**

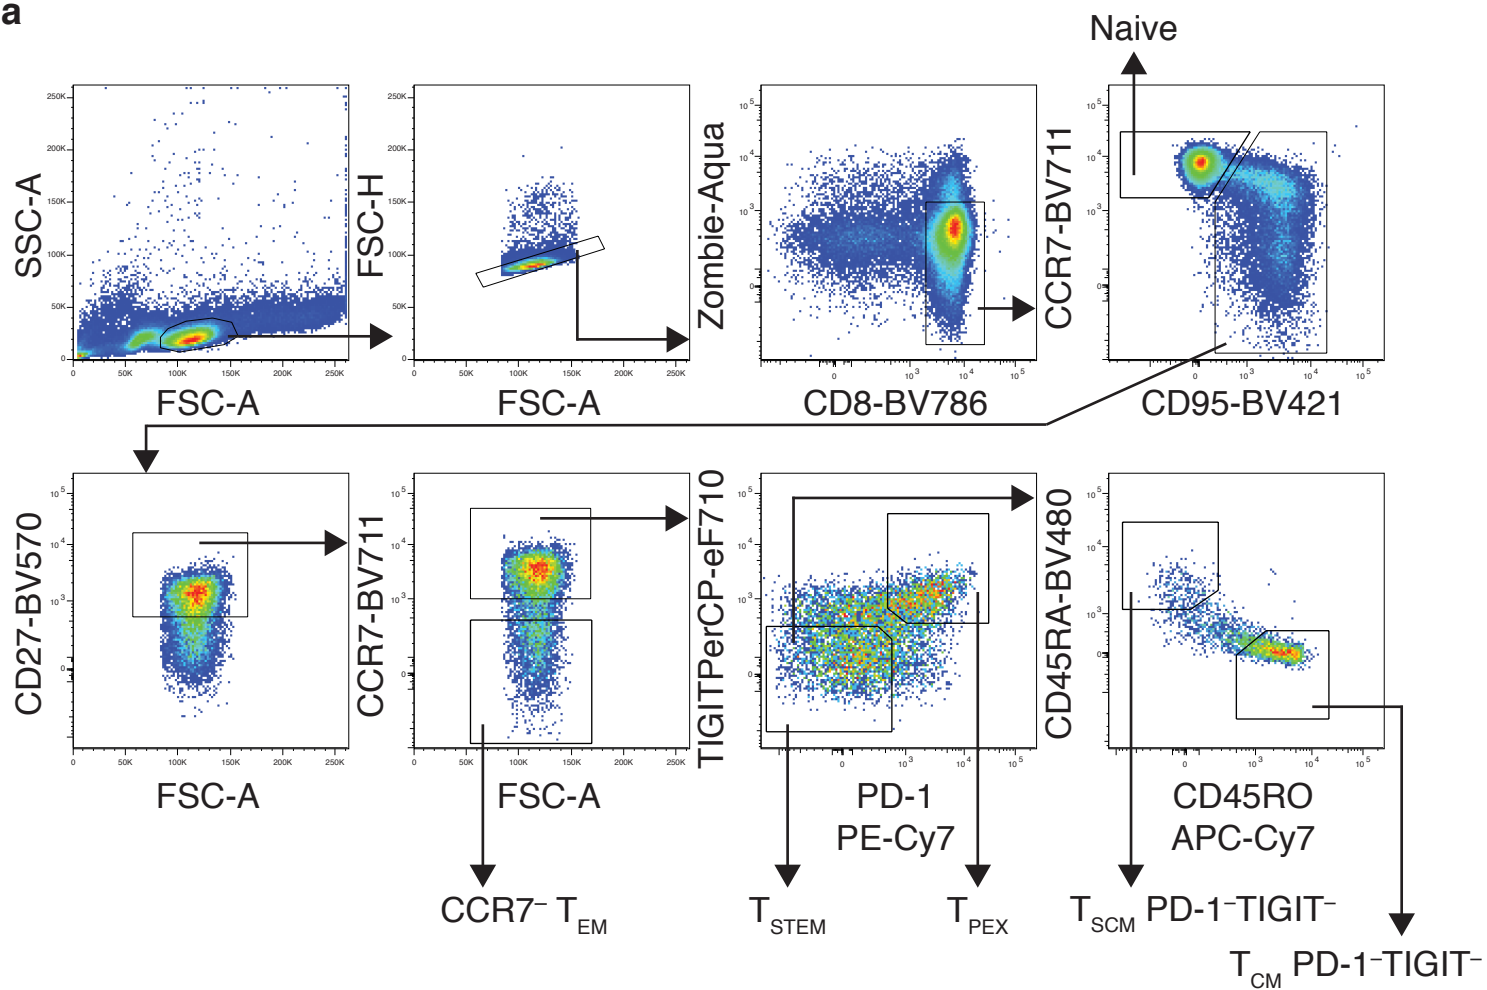

**b**

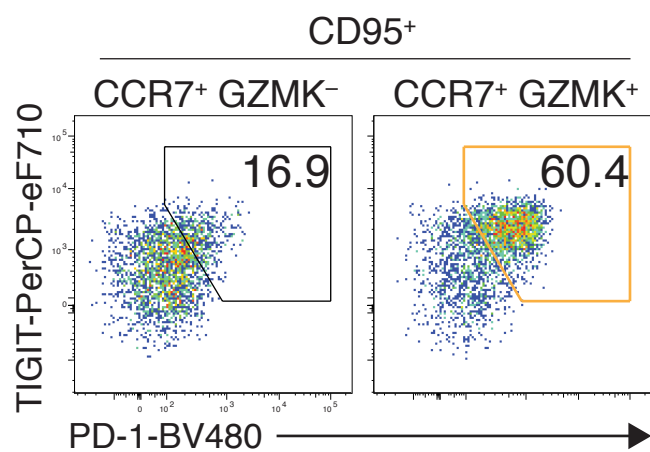

1 **Supplementary Fig. 1. Strategy for the isolation of T cell subsets via FACS. a,** Flow  
2 cytometric gating strategy for the isolation of CD8<sup>+</sup> naive, T<sub>STEM</sub>, T<sub>SCM</sub> PD-1<sup>-</sup> TIGIT<sup>-</sup>, T<sub>CM</sub> PD-  
3 1<sup>-</sup> TIGIT<sup>-</sup>, T<sub>PEX</sub>, and T<sub>EM</sub> cells. **b,** Representative flow cytometric analysis of early differentiated  
4 CD8<sup>+</sup> memory T cells showing the expression of PD-1 and TIGIT.

5

# Supplementary Fig. 2

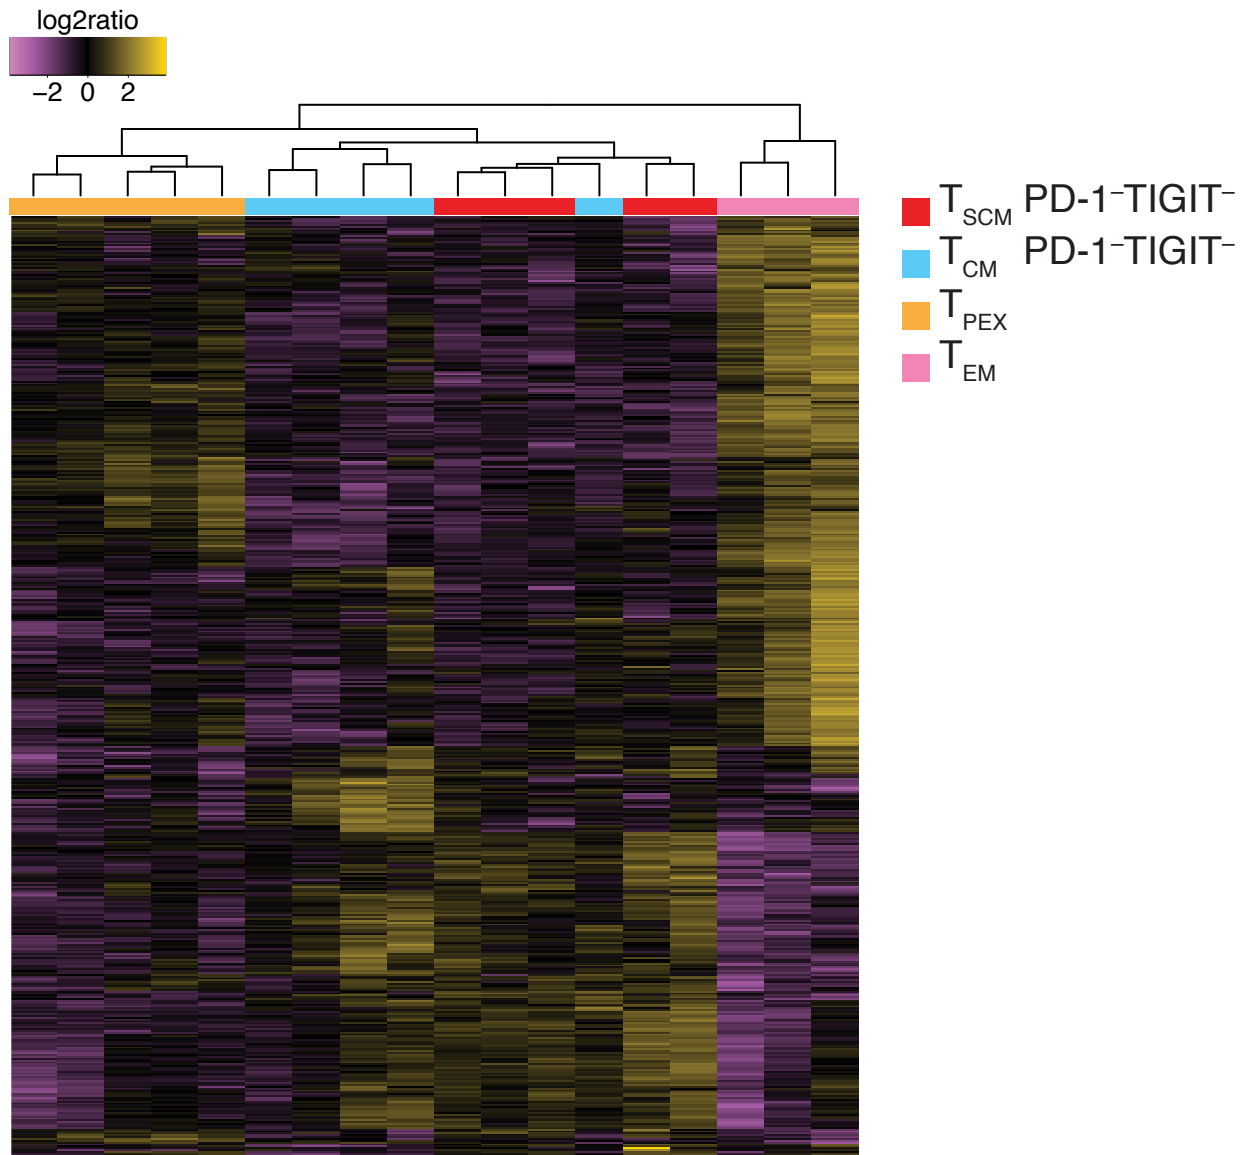



1 **Supplementary Fig. 2. Transcriptomic comparison of T<sub>SCM</sub> and T<sub>CM</sub> cells after depletion of**  
2 **T<sub>PEX</sub> cells.** Heatmap showing DEGs (adjusted *P* value < 0.01) for the indicated CD8<sup>+</sup> memory T  
3 cell subsets (n = 3 donors for T<sub>EM</sub>, n = 5 donors for T<sub>SCM</sub>, T<sub>CM</sub>, and T<sub>PEX</sub>). Significance was  
4 evaluated using edgeR analysis with glmQLFTest and Benjamini-Hochberg correction.

5

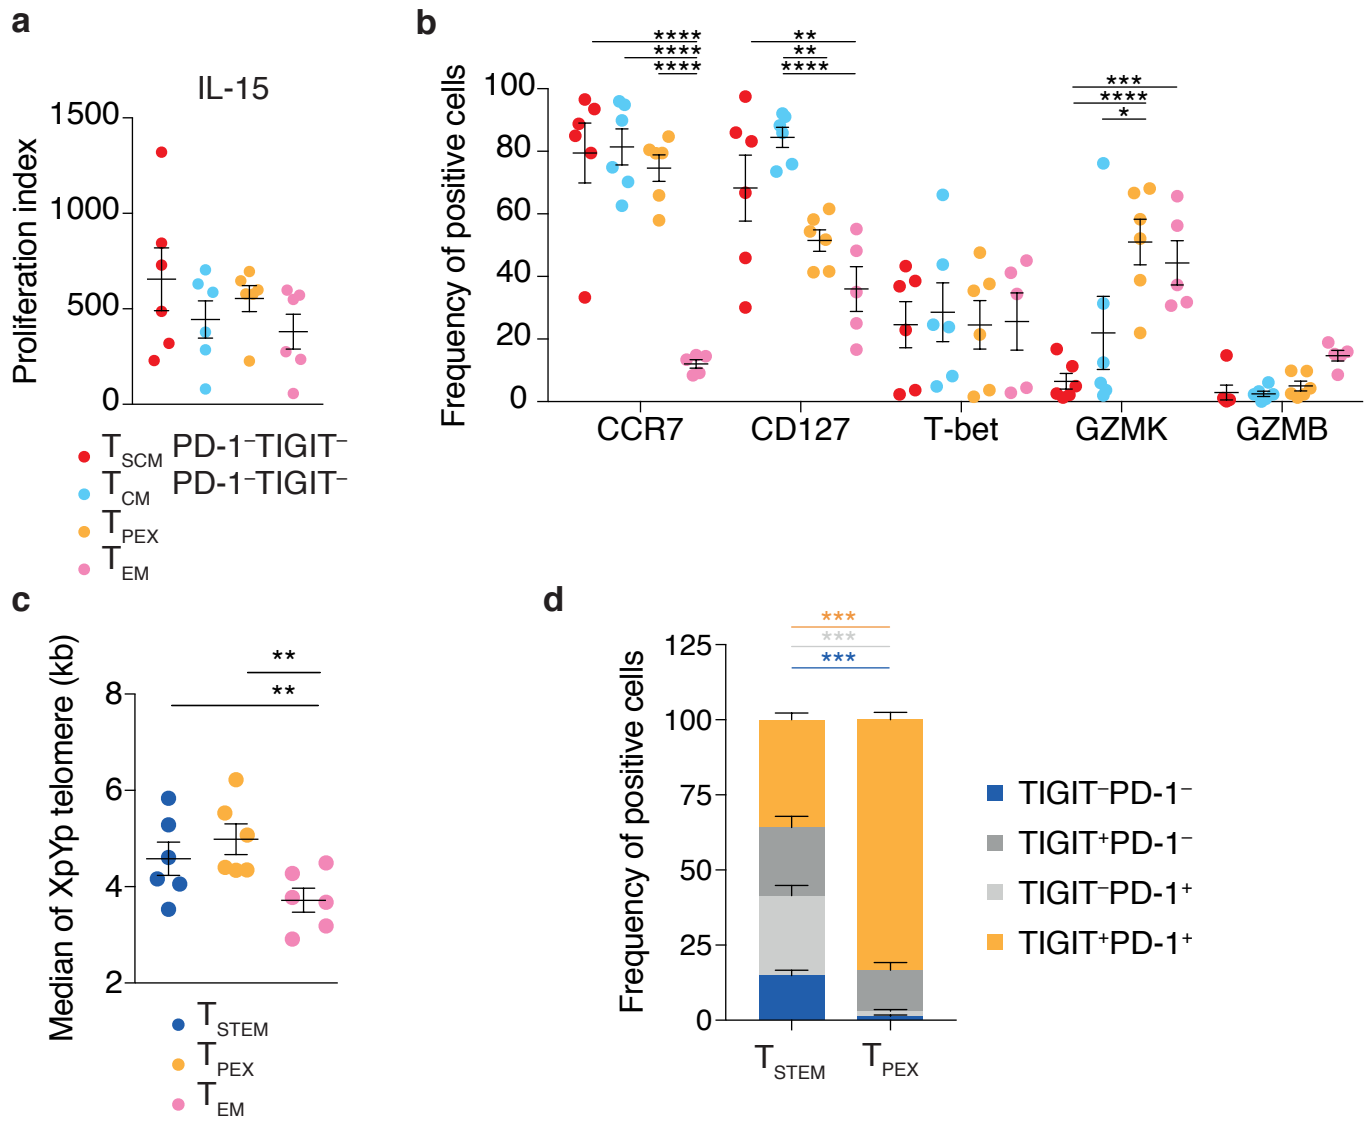

1 **Supplementary Fig. 3. Proliferation and self-renewal capabilities of CD8<sup>+</sup> T cell subsets. a,**  
2 Dot plot showing proliferation indices for the indicated FACS-purified CD8<sup>+</sup> T cell subsets after  
3 stimulation for 10 d with IL-15. Each dot represents one donor (n = 6 from four independent  
4 experiments). Bars indicate mean  $\pm$  SEM. **b,** Dot plot showing the expression of selected  
5 markers among the indicated CFSE<sup>dim</sup> CD8<sup>+</sup> T cell subsets after stimulation as in **a**. Each dot  
6 represents one donor (n = 5 from four independent experiments for T<sub>EM</sub>, n = 6 from four  
7 independent experiments for all other subsets). Bars indicate mean  $\pm$  SEM. \**P* < 0.05, \*\**P* <  
8 0.01, \*\*\**P* < 0.001, \*\*\*\**P* < 0.0001 (two-way ANOVA). **c,** Dot plot showing median telomere  
9 lengths for T<sub>STEM</sub>, T<sub>PEX</sub>, and T<sub>EM</sub> cells. Each dot represents one donor (n = 6). Bars indicate mean  
10  $\pm$  SEM. \*\**P* < 0.01 (one-way repeated measures ANOVA). **d,** Bar graph summarizing the  
11 expression of PD-1 and TIGIT among FACS-purified T<sub>STEM</sub> and T<sub>PEX</sub> cells after stimulation with  
12 anti-CD3 plus CD28 for 4 d in the presence of IL-7 and IL-15 (n = 5 donors from three  
13 independent experiments). Bars indicate mean  $\pm$  SEM. \*\*\**P* < 0.001 (two-tailed Mann-Whitney  
14 U test).

15

# Supplementary Fig. 4

**a**

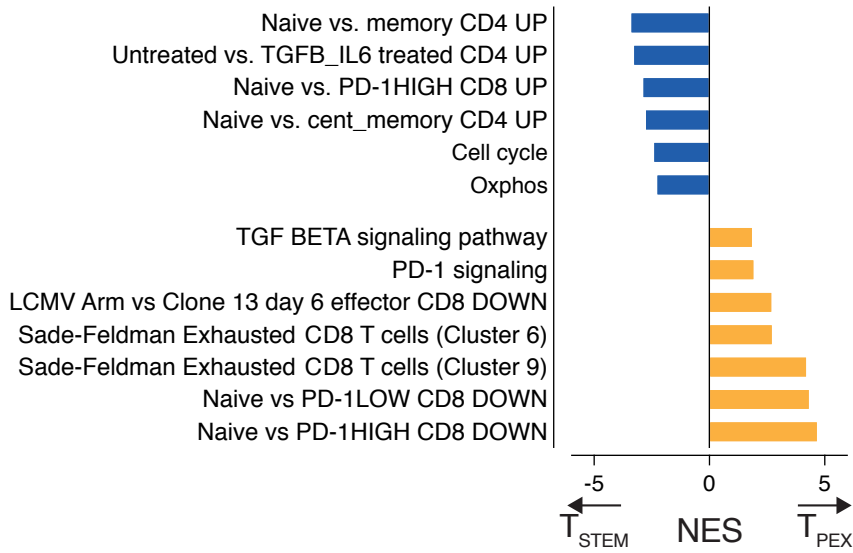

**b**

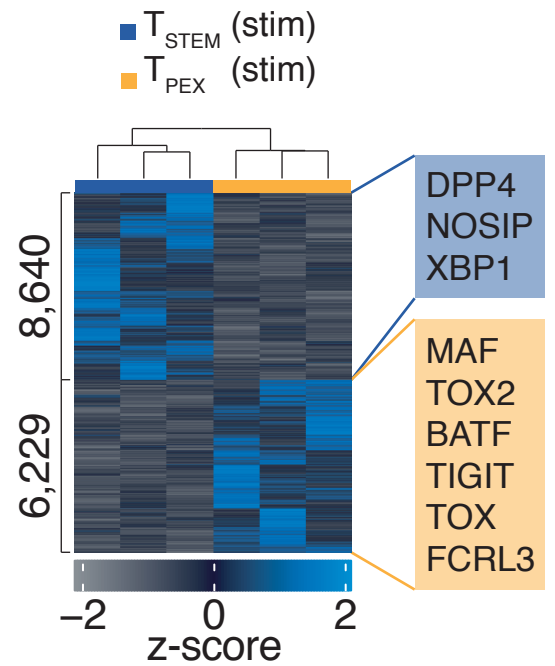

**c**

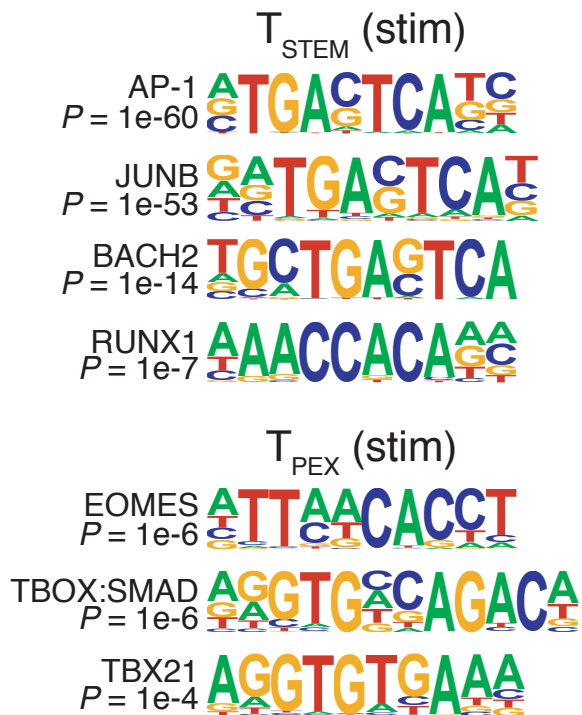

1 **Supplementary Fig. 4. Epigenetic and transcriptomic comparison of activated T<sub>STEM</sub> and**  
2 **T<sub>PEX</sub> cells.** FACS-purified T<sub>STEM</sub> and T<sub>PEX</sub> cells were stimulated with anti-CD3 plus CD28 for 4  
3 d in the presence of IL-2 and IL-12. Cells were then processed for ATAC-seq (n = 3 donors) or  
4 RNA-seq (n = 4 donors). **a**, Normalized enrichment score (NES) of selected gene sets obtained  
5 from GSEA of the RNA-seq data in **Fig. 4h** (adjusted *P* value < 0.05 based on 1,000  
6 permutations). **b**, Heatmap showing DARs related to the experiment in **Fig. 4i**. Labels highlight  
7 accessible genes associated with memory or effector differentiation or exhaustion. **c**, TFBMs  
8 enriched among the DARs identified between activated T<sub>STEM</sub> and T<sub>PEX</sub> cells in **Fig. 4i**.  
9 Enrichment was assessed using a one-sided hypergeometric test in HOMER with correction for  
10 FDR. Stim: stimulated.

11

# Supplementary Fig. 5

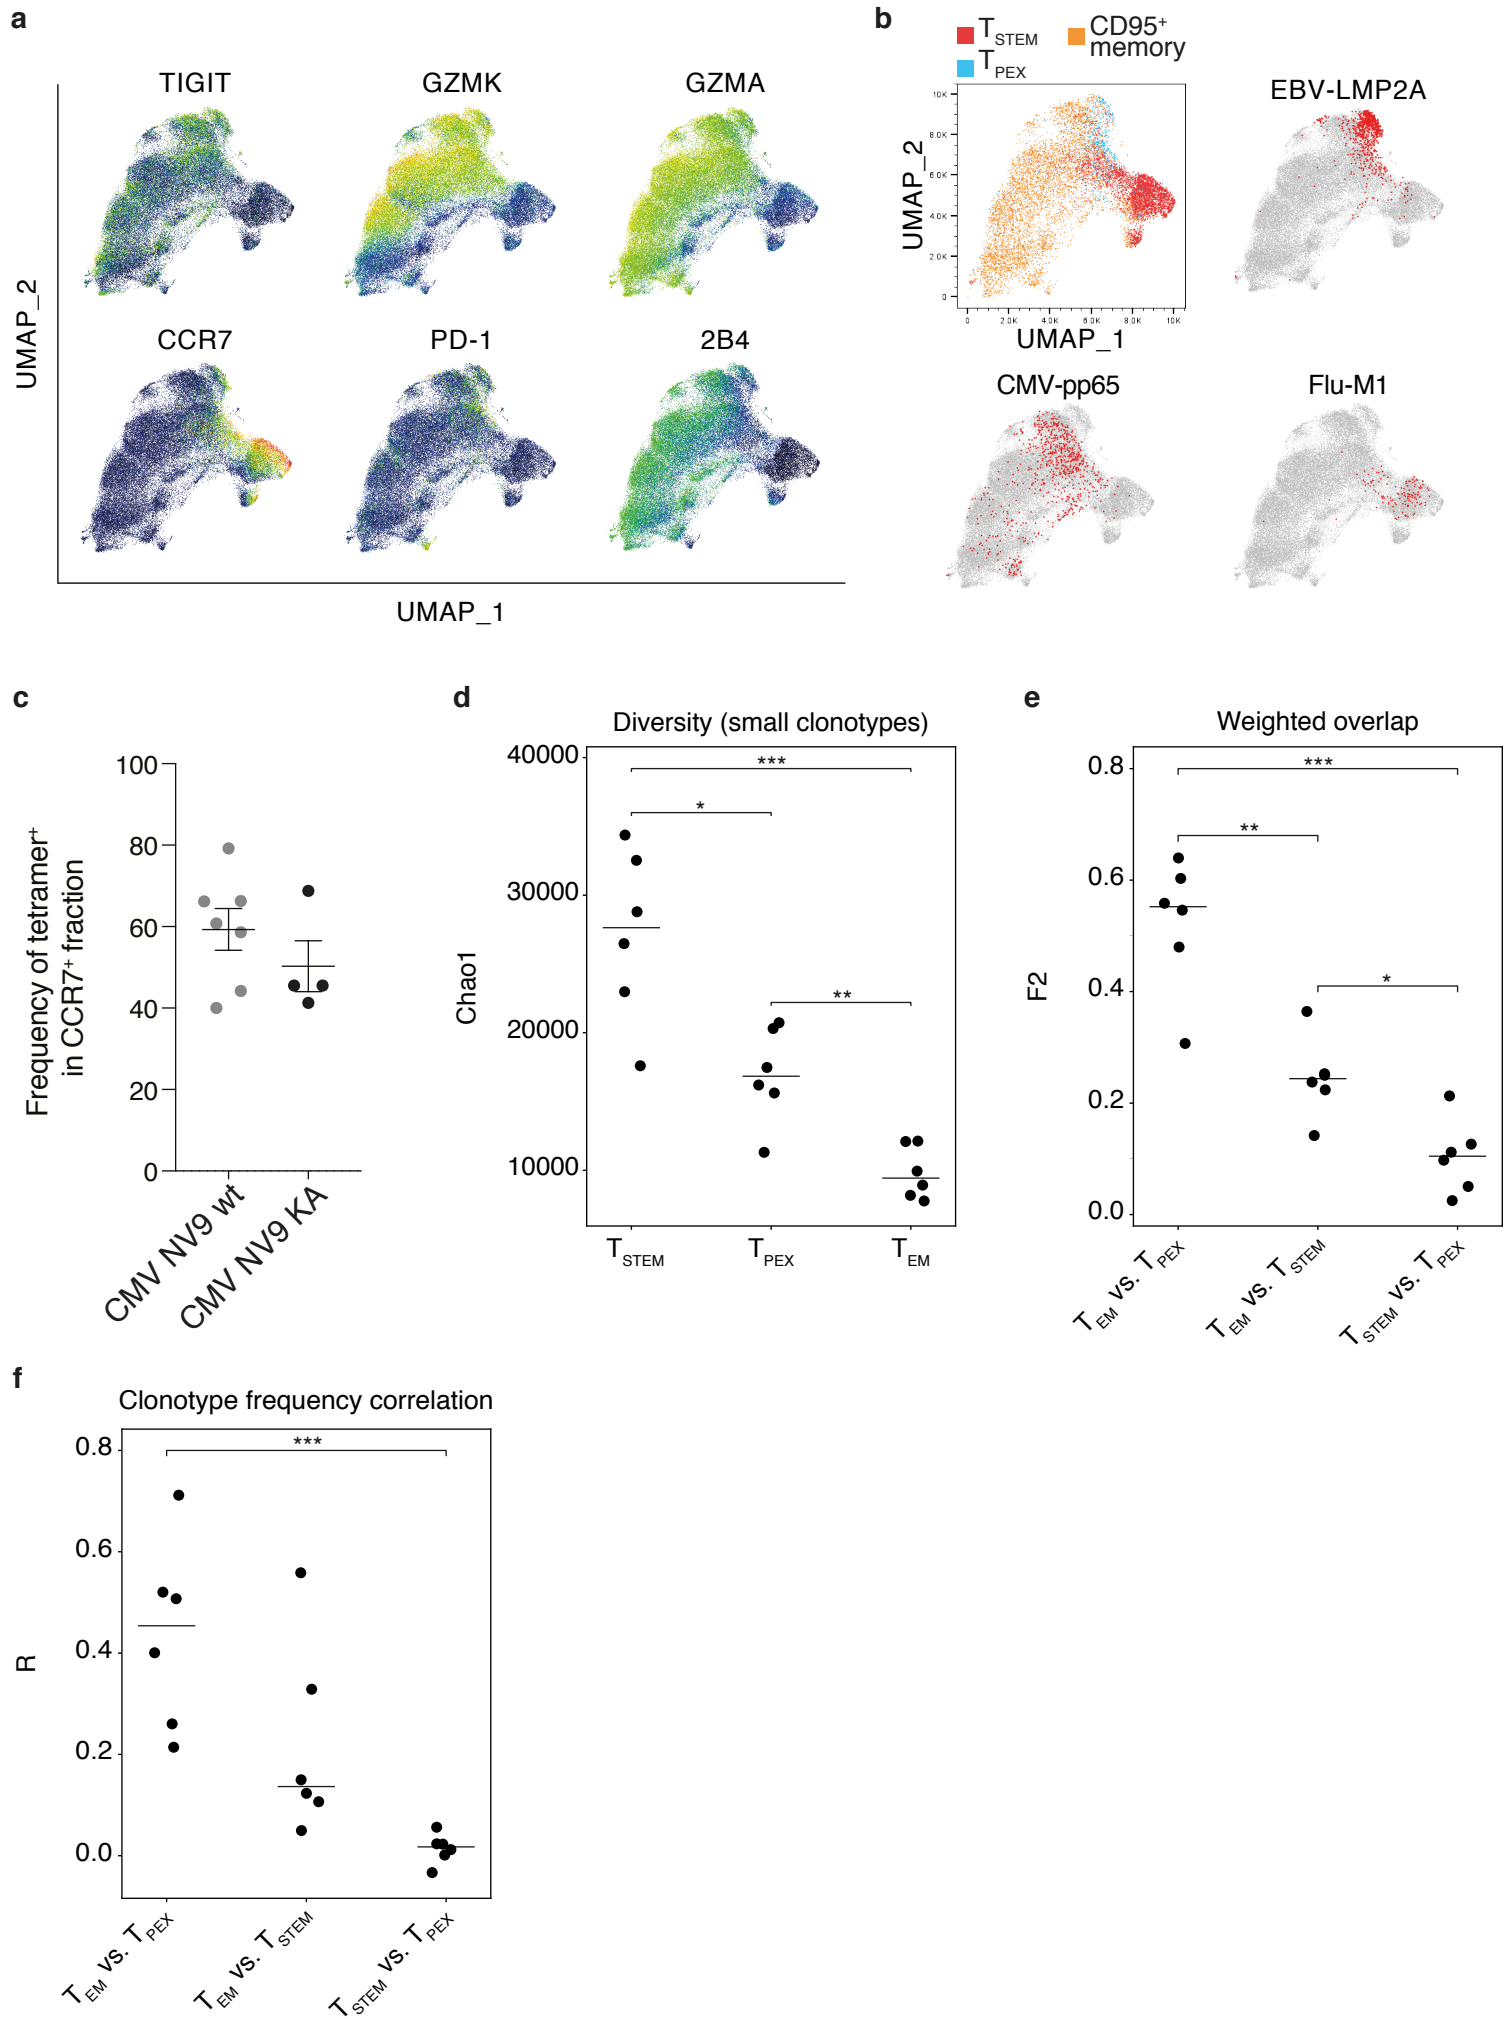

1 **Supplementary Fig. 5. Antigen specificity and repertoire characteristics of T<sub>STEM</sub> and T<sub>PEX</sub>**

2 **cells. a**, UMAP plot showing the expression of selected markers as determined by CyTOF.

3 Similar data were obtained from other healthy donors (n = 4). **b**, UMAP plots showing the

4 distribution of T<sub>STEM</sub> and T<sub>PEX</sub> cells (top left) and antigen-specific CD8<sup>+</sup> memory T cells as

5 determined by CyTOF. Similar data were obtained from other healthy donors (n = 4). **c**, Dot plot

6 showing the matched frequencies of all (wt) or high-avidity (KA) CMV NV9-specific CCR7<sup>+</sup>

7 CD8<sup>+</sup> T cells expressing the T<sub>PEX</sub> signature marker GZMK. Data were obtained using flow

8 cytometry. Each dot represents one donor (n = 7 from three independent experiments for wt, n =

9 4 from three independent experiments for KA). Bars indicate mean ± SEM. **d**, Dot plot showing

10 the Chao1 estimator of clonal diversity for TCRβ repertoires obtained from the T<sub>STEM</sub>, T<sub>PEX</sub>, and

11 T<sub>EM</sub> subsets. Each dot represents one donor (n = 6). Bars indicate median values. \**P* < 0.05, \*\**P*

12 < 0.01, \*\*\**P* < 0.001 (two-tailed paired t-test with Bonferroni correction). **e**, Dot plot showing

13 pairwise comparisons of weighted overlap (F2 metric) for the TCRβ repertoires obtained in **d**.

14 Each dot represents one donor (n = 6). Bars indicate median values. \**P* < 0.05, \*\**P* < 0.01, \*\*\**P*

15 < 0.001 (two-tailed paired t-test with Bonferroni correction). **f**, Dot plot showing clonotype

16 frequency correlations (R metric) for the TCRβ repertoires obtained in **d**. Higher values indicate

17 stronger correlations. Each dot represents one donor (n = 6). Bars indicate median values. \*\*\**P*

18 = 0.0007 (two-tailed paired t-test with Bonferroni correction).
